# Supplementary material for: A comparative study of an anaerobic-oxic (AO) system and a sequencing batch biofilm reactor (SBBR) in coating wastewater treatment and their microbial communities
Source: publisher site journal article supplement (doi:10.1515/npprj-2019-0024), 2020-02-01
Supplement: Supplementary file 1 [file npprj-2019-0024suppb.doc]

Supplementary file B: Treatment results of SBBR during the start-up

**1. Methods**

1.1 Sludge cultivation and acclimation

Nutrient solution made of glucose, ammonium nitrate and dipotassium phosphate according to a certain C:N:P (100:5:1) ratio was supplied to cultivate the sludge. The COD of the influent ranged from 400 mg/L to 1400 mg/L. The acclimation of sludge was carried out after the cultivation stage of the sludge as nutrient solution (COD of 200 mg/L) and coagulated wastewater were mixed according to certain proportions (3:1,1:1 and 1:3) as influent and supplied to the reactor.

During the cultivation and acclimation stage, the HRT was set as 24 h. While an operation cycle was set as 6 h, the first 3 h belonged to anaerobic phase as the aerator was switched off, the next 3 h belonged to the aeration phase as the aerator was turned on.

1.2 Aeration time and HRT

After the acclimation stage, the coagulated wastewater was served as the influent and the reactor was operated under condition of 24 h HRT, 3 h anaerobic time and 3 h aeration time for 12 d. After then, the SBBR was operated under different HRT and different aeration time.The operation of SBBR was therefore divided into 6 phases according to HRT and aeration time, with each phase lasting for 10 d. The information of each phase was listed in table 1.

**Table 1** Different phases of the SBBR

| Items | **Phase** | | | | |  |
| --- | --- | --- | --- | --- | --- | --- |
| 1 | 2 | 3 | 4 | 5 | 6 |
| Days | 10 | 10 | 10 | 10 | 10 | 10 |
| HRT （h） | 18 | 18 | 12 | 12 | 9 | 9 |
| Anaerobic time（h） | 4 | 3 | 2 | 1 | 1 | 0 |
| Aeration time（h） | 2 | 3 | 4 | 5 | 5 | 6 |

**2. Results**

2.1 Sludge cultivation and acclimation

The COD removal of SBBR during the cultivation period is presented in Fig. 1. With the supply of the nutrient solution, the removal of COD increased from about 50% to 95% during the 15 cycles of cultivation stage. The COD of influent also increased from 800 to 1400 mg/L during the same time. Due to that 1400 mg/L has already surpassed the COD rangeof the coagulated wastewater, the sludge was proposed to have satisfied the requirements of acclimation.

The sludge acclimation was implemented after the cultivation stage, with the CODrange and removal during this period being presented in Fig. 2. In general, a tendency of firstly going up and then stabilizing of CODremoval was presented due to that the activated microorganism may require some time to adapt to the coating wastewater. 8 cycles and 6 cycles were taken for the CODremoval to increase from 40% to 60% and from 50% to 60%, with the the COD of effluentranging from 300 mg/L to 400mg/L and 600 to 700mg/L respectively. After then, a stabilized CODremoval of around 60% was rapidly reached when the coagulation effluent was directly added into the SBBR. Eventually, with the sludge being adopted by the packings in the biofilm area and the wastewater in the aeration area being clarified, the sludge acclimation was proposed to be accomplished.

**Fig. 1** Treatment effect of SBBR reactor during sludge cultivation stage

**Fig. 2** Treatment effect of SBBR reactor during sludge acclimation stage

2.2 Aeration time and HRT

The SBBR performance under different HRT and aeration time was detected and shown in Fig. 3. With the anaerobic reaction time being 4 h, aeration time being 2 h and HRT being 18 h, the COD was reduced from roughly 922.7 mg/L to around 448.6 mg/L, indicating a COD removal of 51.4%. Considering that the anaerobic reaction time was longer than the aerobic reaction time, the anaerobic bacteria was supposed to be the dominant microorganism and may play a major role in digesting the pollutants.

When the aeration time was increased and the anaerobic reaction time was decreased, the COD removal experienced great changes. Firstly, the COD removal increased to 75.6% as the COD was decreased from around 941.7 mg/L to around 226.6 mg/L, with the anaerobic reaction time being 2 h, the aeration time being 4 h and the HRT being 12 h. Then, the COD removal surpassed 60% with aeration time being 2 h, anaerobic time being 4 h under the same HRT. Eventually, when the HRT was reduced to 9 h, the COD removal efficiency reached 87.6% with 1 h of anaerobic reaction time and 5 h of aeration time and 87.1% with 6 h of aeration time.





**Fig. 3** COD removal of SBBR under different HRT and aeration time
